# Supplementary material for: Hepatitis B Vaccine Non-Responders Show Higher Frequencies of CD24highCD38high Regulatory B Cells and Lower Levels of IL-10 Expression Compared to Responders
Source: PubMed Central journal article supplement (PMC8461011; doi:10.3389/fimmu.2021.713351), 2021-09-10
Supplement: Image_1.pdf [file Image_1.pdf]

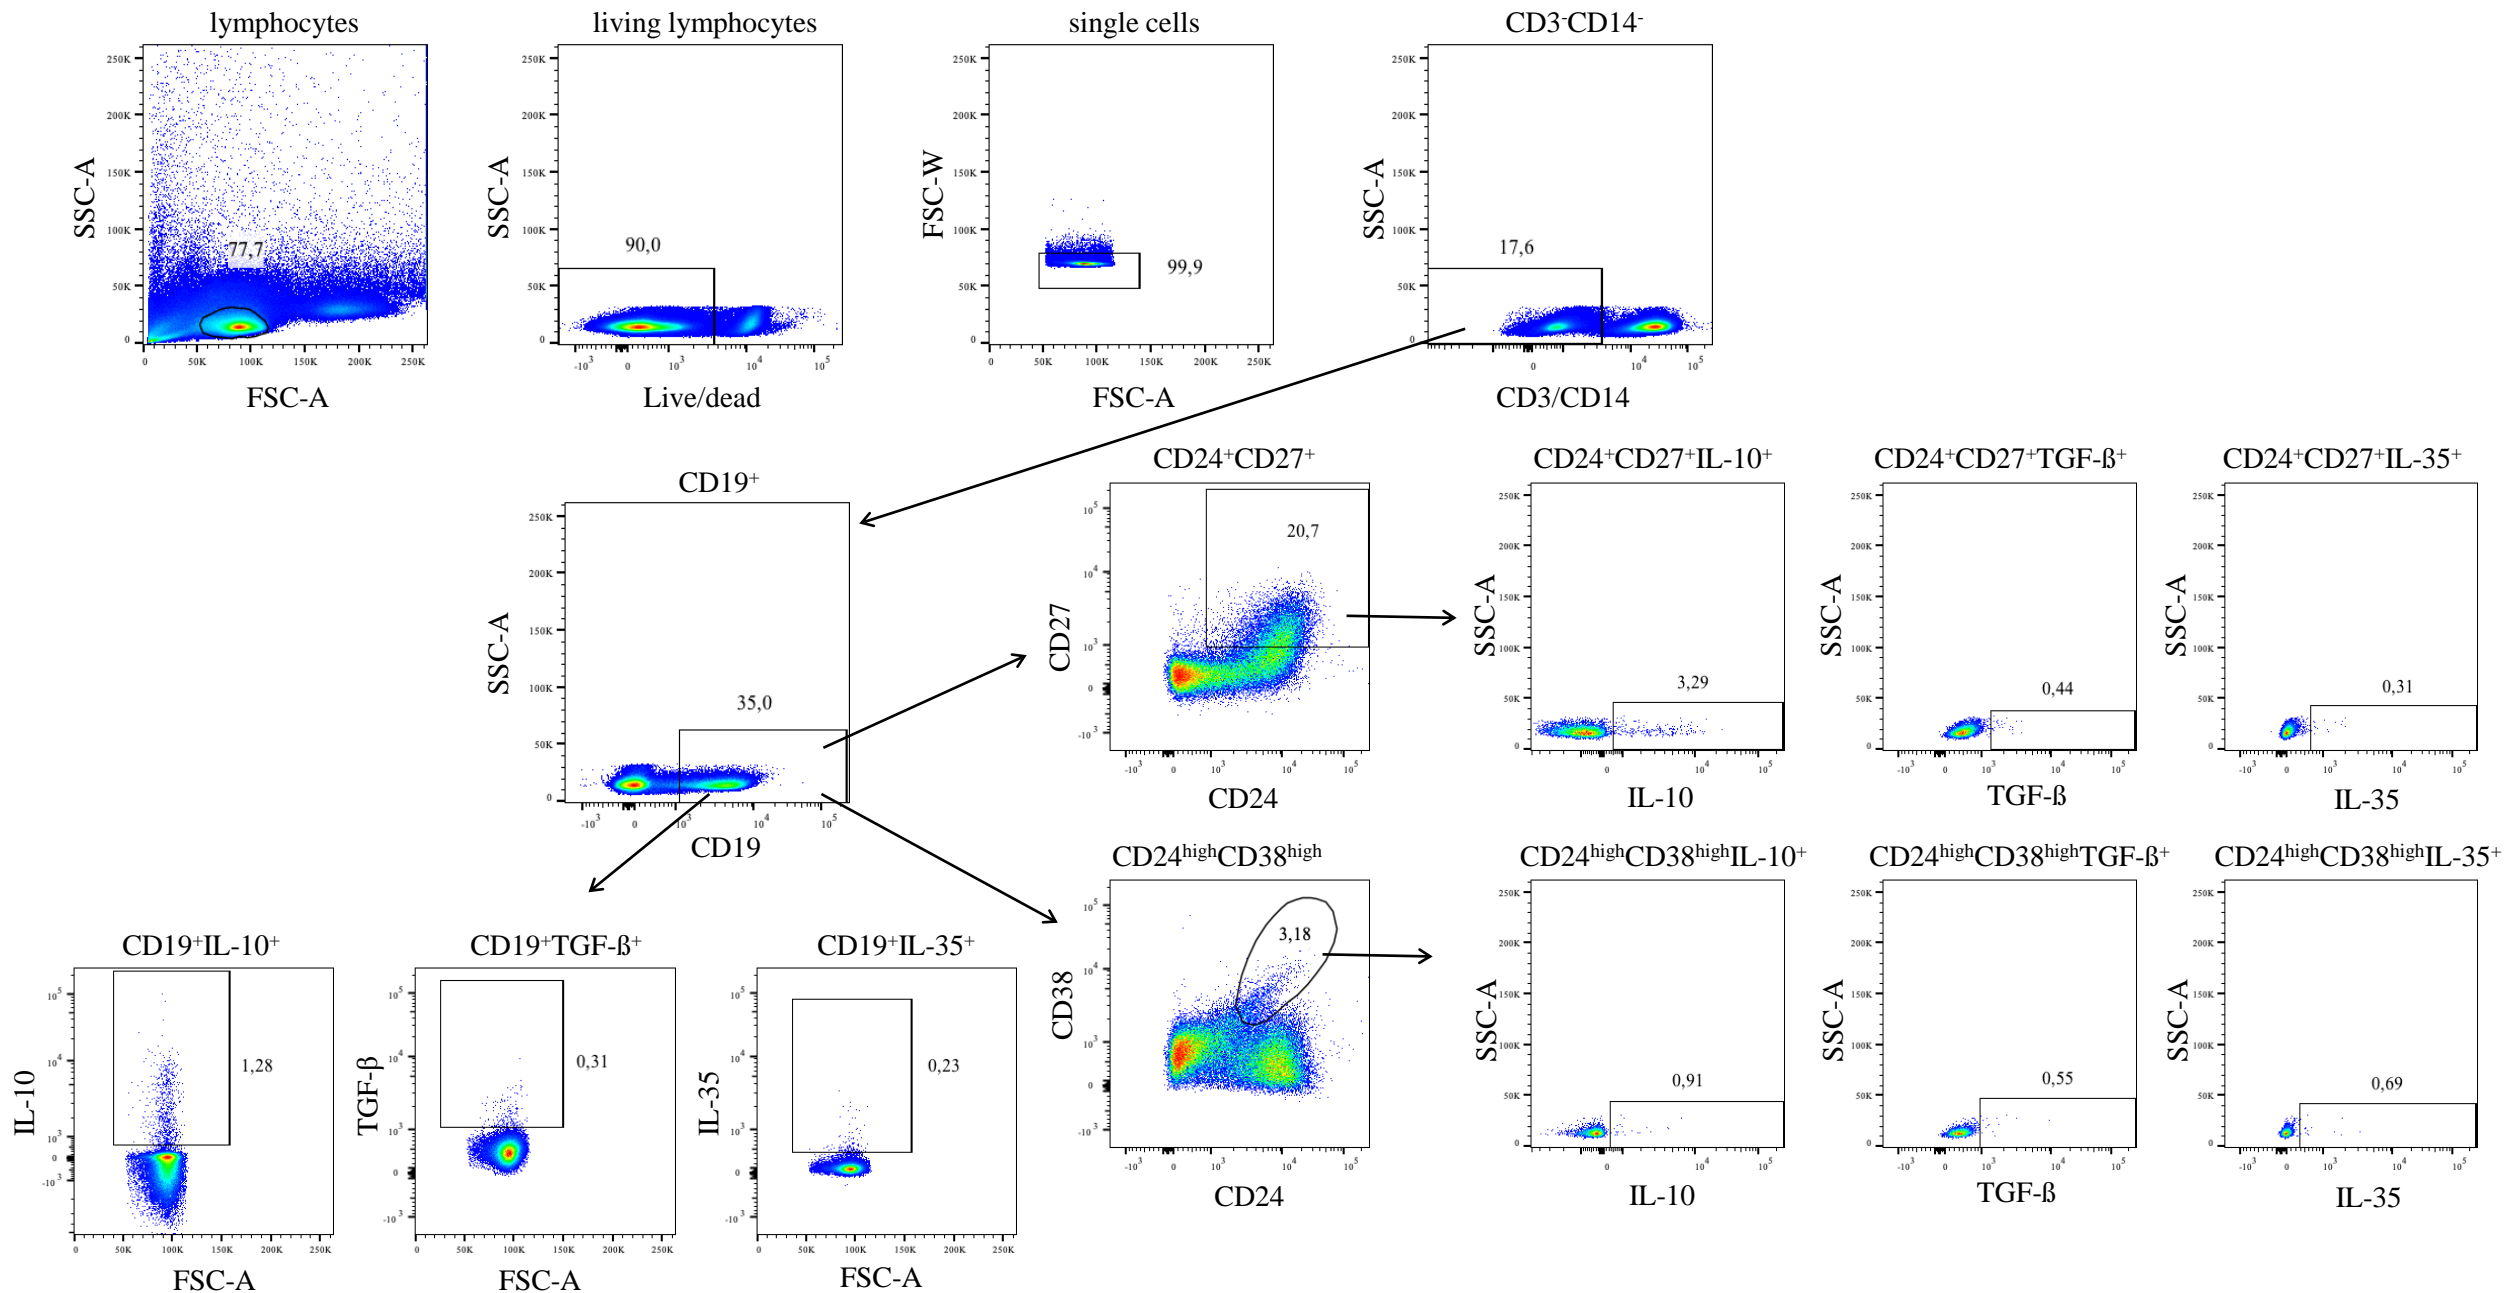

**Additional file 2: Figure S1: Representative gating strategy for phenotypical analysis of Breg.** Flow cytometry plots showing the gating strategy applied to determine CD19<sup>+</sup> cells, Breg subpopulations and the respective cytokine expression. Markers used to define each gate are indicated. Arrows between plots indicate subgating.
