# Supplementary material for: Hepatitis B Vaccine Non-Responders Show Higher Frequencies of CD24highCD38high Regulatory B Cells and Lower Levels of IL-10 Expression Compared to Responders
Source: PubMed Central journal article supplement (PMC8461011; doi:10.3389/fimmu.2021.713351), 2021-09-10
Supplement: Table_1.pdf [file Table_1.pdf]

**Additional file 1: Table S1. Antibodies used for surface and intracellular cytokine staining**

| <b>Antibody</b>                      | <b>Clone</b> | <b>Assay concentration<br/>(<math>\mu\text{g/mL}</math>)</b> | <b>Company</b> |
|--------------------------------------|--------------|--------------------------------------------------------------|----------------|
| CD3-BUV395                           | SK7          | 0.8                                                          | BD Biosciences |
| CD14-BUV395                          | M $\phi$ P9  | 2.5                                                          | BD Biosciences |
| CD19-BV421                           | HIB19        | 1.3                                                          | BioLegend      |
| CD24-BV605                           | ML5          | 3.0                                                          | BioLegend      |
| CD27-BV480                           | L128         | 5.0                                                          | BD Biosciences |
| CD38-BV785                           | HIT2         | 5.3                                                          | BioLegend      |
| IL-10-PE-Dazzle594                   | JES3-19F1    | 1.5                                                          | BioLegend      |
| EBI3 (IL-27 subunit)-<br>APC (IL-35) | ebic6        | 0.3                                                          | Invitrogen     |
| LAP (TGF- $\beta$ )-FITC             | TW4-2F8      | 10.0                                                         | BioLegend      |
